# Supplementary material
Source: publisher site journal article supplement (https://www.spandidos-publications.com/2978/downloadSupplementary)
Supplement: Supplementary file 1 [file downloadSupplementary]

Figure S1. Immunohistochemical staining intensity of SLP-2 in pancreatic cancer. The staining intensity was scored as (A) 0 (negative), (B) 1 (weak), (C) 2 (moderate), or (D) 3 (strong). SLP-2, stomatin-like protein 2.

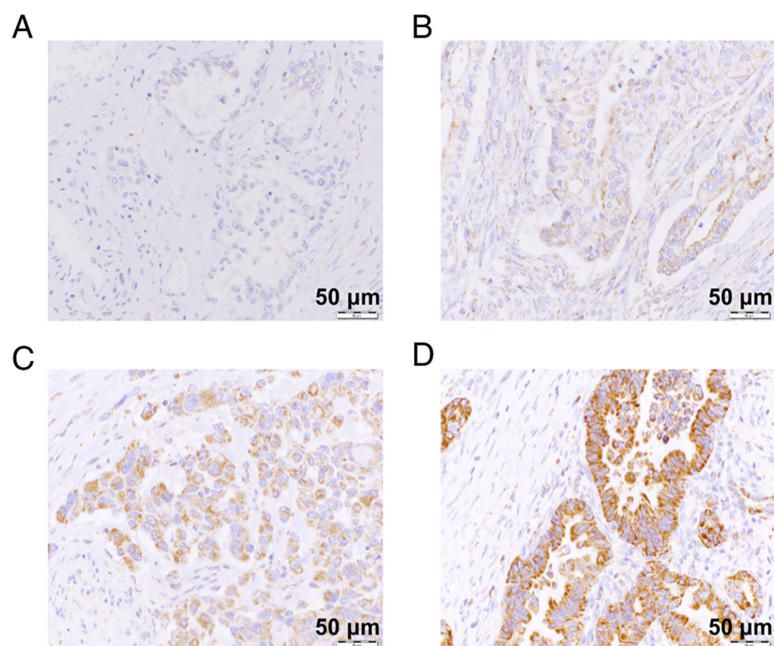

Figure S2. Unmodified western blots. (A) SLP-2 expression, (B) GFPT-2 expression. SLP-2, stomatin-like protein 2; GFPT2, glutamine-fructose-6-phosphate transaminase 2.

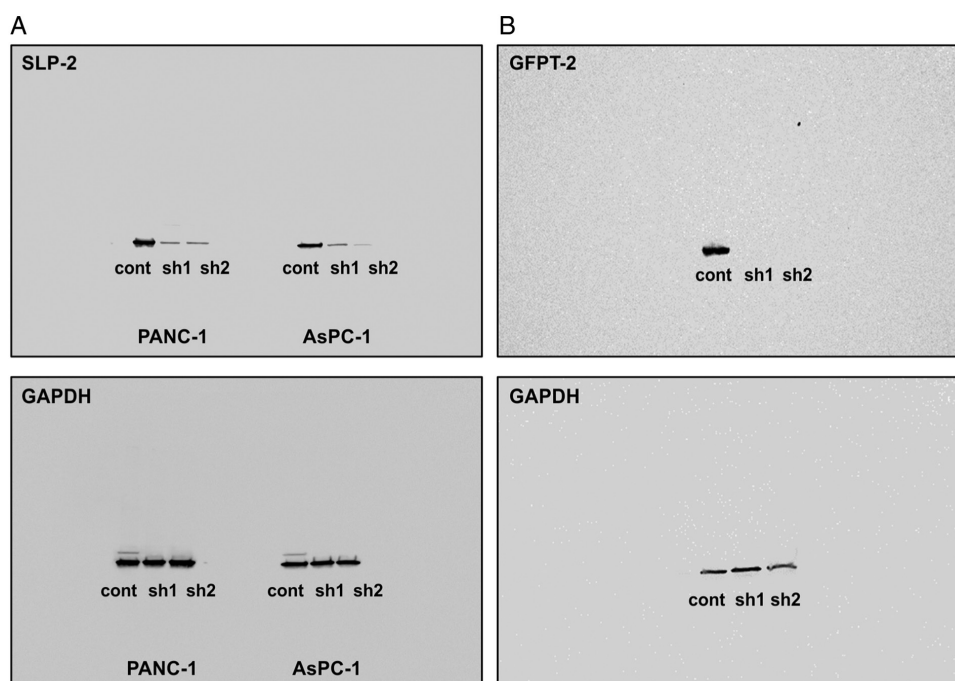

Figure S3. Proliferation of pancreatic cancer cells after SLP-2 suppression. (A) Proliferation curve of AsPC-1 cells. No significant difference was revealed among three groups (cont, sh1 and sh2) during the 4-day growth rate ( $P=0.944$ ). (B) Proliferation curve of PANC-1 cells. No significant difference was revealed among three groups (cont, sh1 and sh2) during the 4-day growth rate ( $P=0.532$ ). SLP-2, stomatin-like protein 2; cont, control; sh, short hairpin.

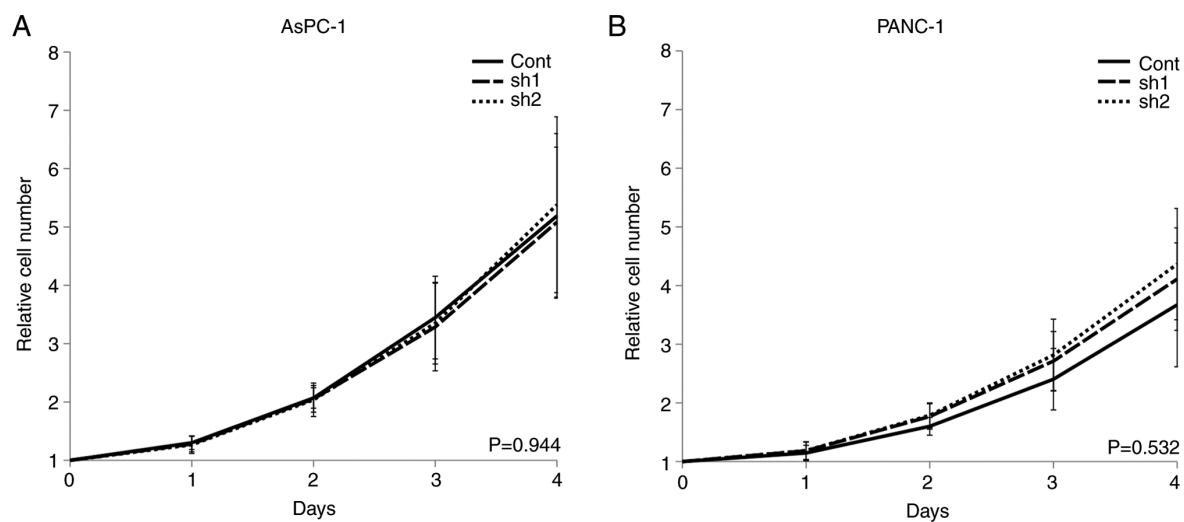

Figure S4. SLP-2 inhibition does not alter the sensitivity of PC cells to gemcitabine. (A) AsPC-1 cells exhibited no significant differences in the  $IC_{50}$  values among three groups (cont, sh1 and sh2) ( $P=0.713$ ). (B) PANC-1 cells exhibited no significant differences in the  $IC_{50}$  values among three groups (cont, sh1 and sh2) ( $P=0.989$ ). SLP-2, stomatin-like protein 2; cont, control; sh, short hairpin.

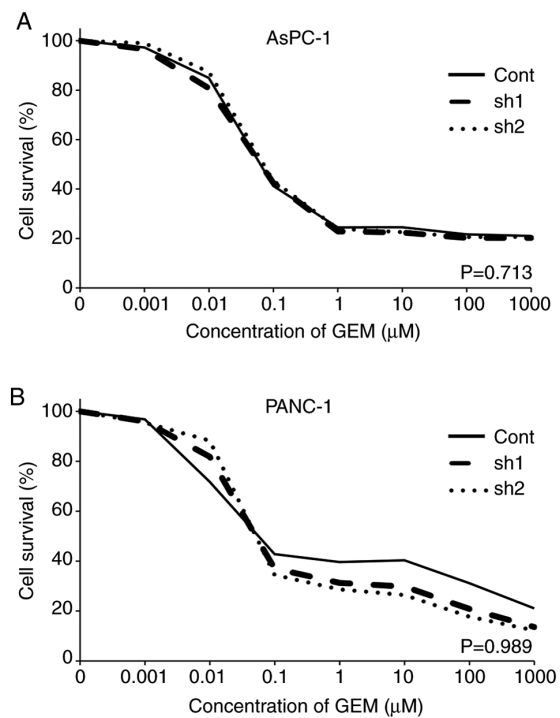

Figure S5. Comparison of the expression of SLP-2 with resectability status and NAC status. (A) Non-NAC patients. There was no significant difference in SLP-2 expression among three groups (R, BR and UR) ( $P=0.839$ ). (B) NAC patients. There was no significant difference in SLP-2 expression among three groups (R, BR and UR) ( $P=0.534$ ). (C) Comparison of SLP-2 expression between non-NAC and NAC patients. SLP-2 expression was significantly increased in NAC patients ( $P=0.019$ ). SLP-2, stomatin-like protein 2; NAC, neoadjuvant chemotherapy; R, resectable; BR, borderline resectable; UR, unresectable.

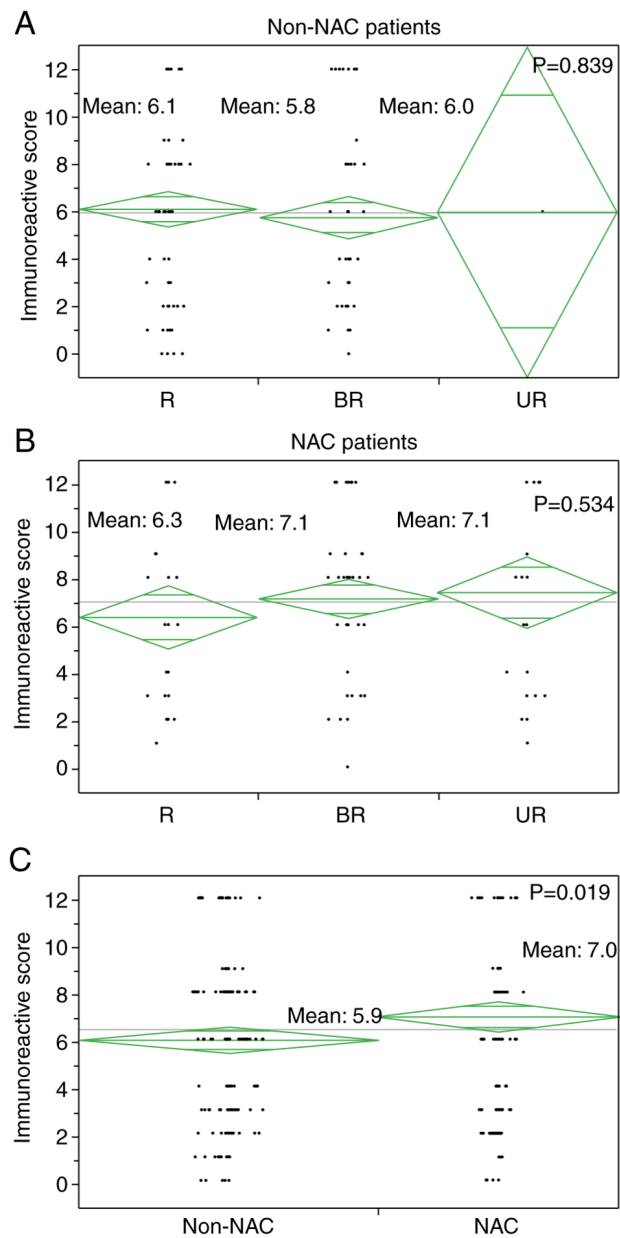

Table SI. Sequences of shRNA and primers used.

| Category | Sequences                                                                                                                                                                   |
|----------|-----------------------------------------------------------------------------------------------------------------------------------------------------------------------------|
| shRNA1   | Sense: 5'GATCCGGCTAAAGCTGAAGCTATTCTGTGAAGCCACAGATGGGAATAGCTTCAGCTCCTTTTTTA3'<br>Antisense: 5'AGCTTAAAAAAGGCTAAAGCTGAAGCTATTCCCATCTGTGGCTTCACAGAATAGCTTCAGCTTTAGCCG3'        |
| shRNA2   | Sense: 5'GATCCGAACCTTTAGTCGTGTAATACTGTGAAGCCACAGATGGGTATTACACGACTAAAGTTCTTTTTTA-3'<br>Antisense: 5'AGCTTAAAAAAGAACTTTAGTCGTGTAATACCCATCTGTGGCTTCACAGTATTACACGACTAAAGTTCG-3' |
| SLP-2    | F: 5'-CAGTATGTCAGCGCGTTCTCC-3'<br>R: 5'-AGGGCTCCATATACACCCAT-3'                                                                                                             |
| GFPT2    | F: 5'-TGGGAAACTCTCCATTCACC-3'<br>R: 5'-TCATGATTTGCTGCAGTTCC-3'                                                                                                              |
| GAPDH    | F: 5'-GCACCGTCAAGGCTGAGAAC-3'<br>R: 5'-TGGTGAAGACGCCAGTGGA-3'                                                                                                               |

SLP-2, stomatin-like protein 2; GFPT2, glutamine-fructose-6-phosphate transaminase 2; sh, short hairpin; F, forward; R, reverse.
